# Supplementary material for: Poly(pyridinium iodide ionic liquid)-based electron injection layers for solution-processed organic light-emitting devices
Source: Royal Society of Chemistry journal article supplement (doi:10.1039/c6tc00792a), 2016-01-01
Supplement: c6tc00792a1.pdf [file c6tc00792a1.pdf]

## Supplementary information

### **Poly(pyridinium iodide ionic liquid)-based Electron Injection Layer for Solution-processed Organic Light-emitting Devices**

Satoru Ohisa,\* Yong-Jin Pu and Junji Kido\*

Department of Organic Materials Science, Graduate School of Organic Materials Science,  
Yamagata University, Yonezawa, Yamagata, 992-8510 Japan.

E-mail: s.ohisa@yz.yamagata-u.ac.jp; kid@yz.yamagata-u.ac.jp

**Table S1. The results of the solubility test of PILs at a concentration of 1 mg/mL.**

○: dissolution. ×: not dissolution.

| Solvent         | $\epsilon^a$ | Kosower |      |      |      |
|-----------------|--------------|---------|------|------|------|
|                 |              | $Z^b$   | P-C3 | P-C4 | P-C6 |
| Water           | 80.2         | 94.6    | ○    | ×    | ×    |
| Methanol        | 32.7         | 83.6    | ○    | ○    | ○    |
| Ethanol         | 24.6         | 79.6    | ×    | ×    | ○    |
| 2-propanol      | 19.9         | 76.3    | ×    | ×    | ×    |
| Acetonitrile    | 35.9         | 71.3    | ×    | ×    | ○    |
| Dichloromethane | 8.9          | 64.2    | ×    | ×    | ○    |
| Chloroform      | 4.8          | 63.2    | ×    | ×    | ○    |
| Tetrahydrofuran | 7.6          | 58.8    | ×    | ×    | ×    |
| Pyridine        | 12.9         | 64.0    | ×    | ×    | ○    |
| Hexane          | 1.9          | –       | ×    | ×    | ×    |
| Cyclohexane     | 2.0          | 60.1    | ×    | ×    | ×    |
| Toluene         | 2.4          | –       | ×    | ×    | ×    |

<sup>a</sup>Dielectric constant at 20°C;<sup>1</sup> <sup>b</sup>Kosower's solvent parameter derived from the wavelength of the charge-transfer band in the visible spectrum of 1-ethyl-4-methoxycarbonylpyridinium iodide ( $Z = 2.859 \times 10^4 / \lambda$  where  $\lambda$  is the position of the absorption maximum in nanometers)<sup>1</sup>

## Synthesis of the PILs

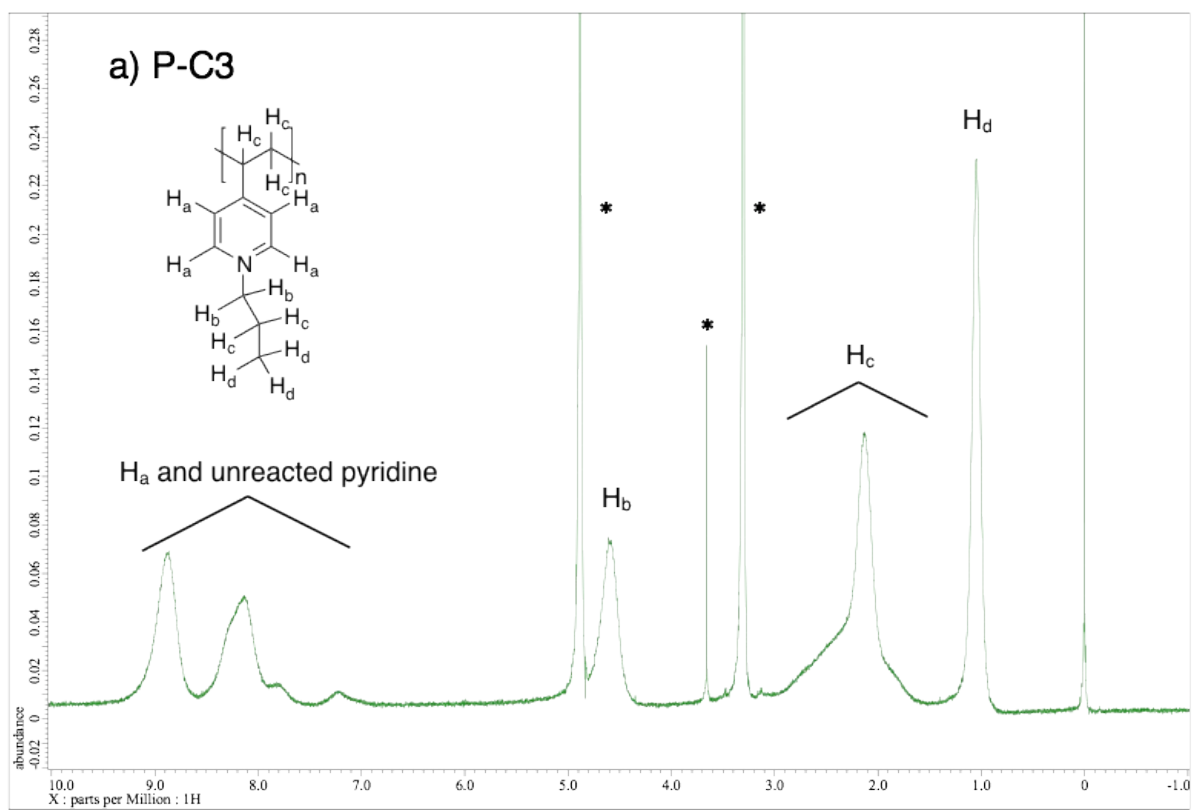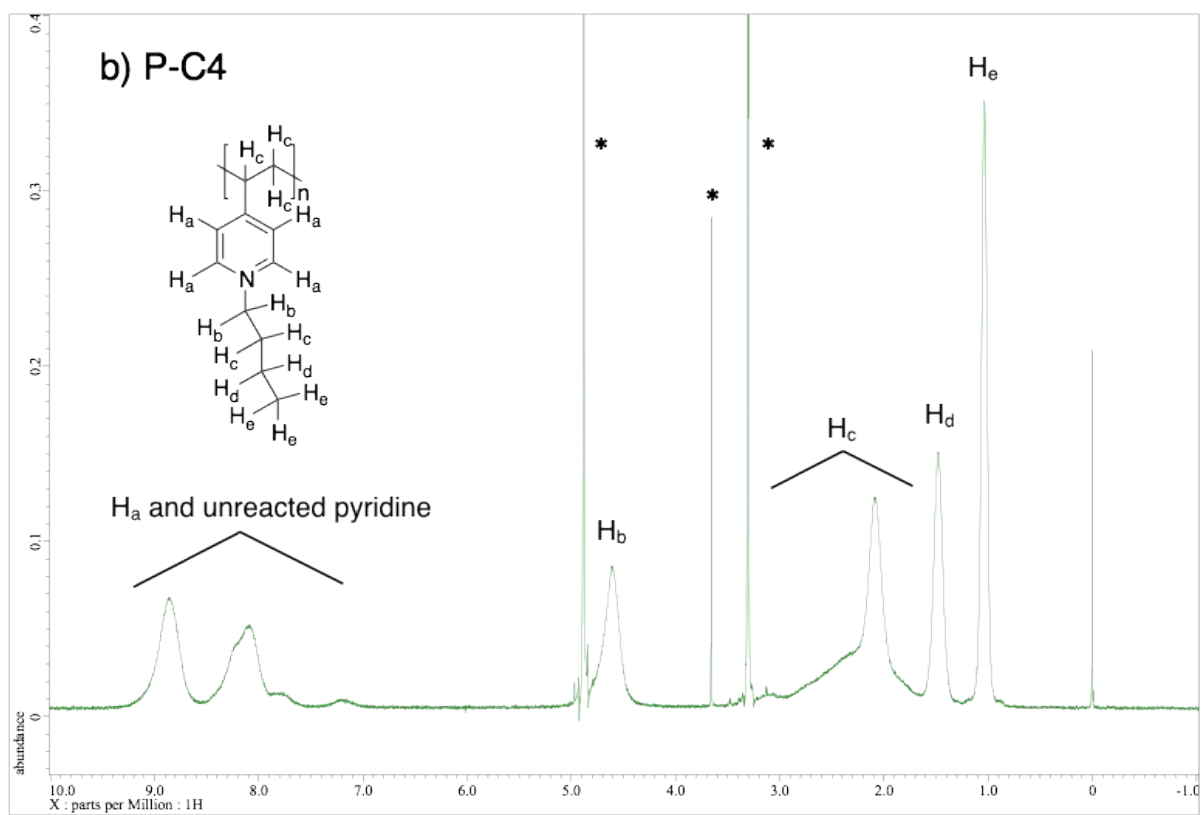

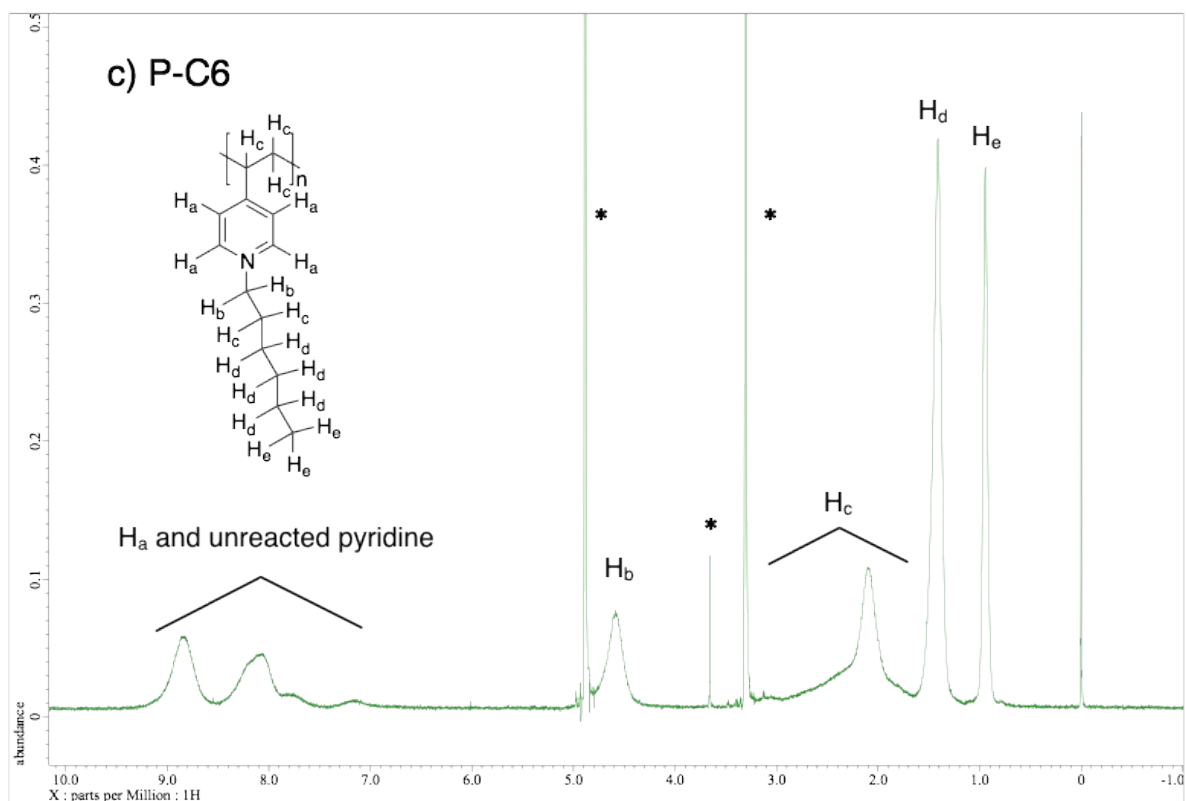

**Figure S1.**  $^1\text{H}$ -NMR spectra of PILs in methanol- $\text{d}_4$ . a) P-C3. b) P-C4. c) P-C6. Asterisks were derived from methanol- $\text{d}_4$  or 1,4-dioxane.

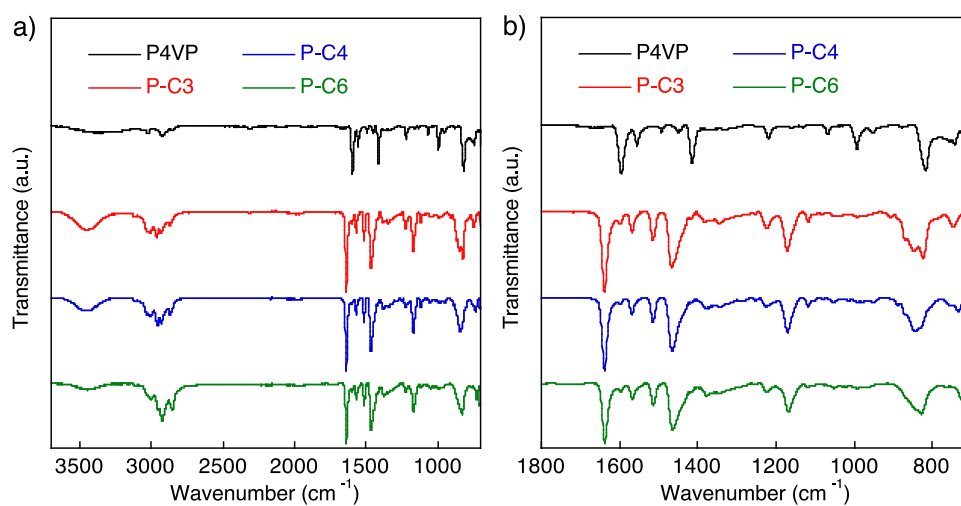

**Figure S2.** IR spectra of P4VP and PILs powder. a) Whole spectra. b) Expanded spectra in low wavenumber region.

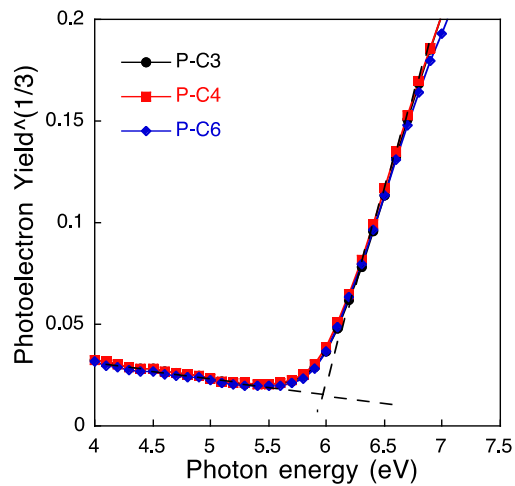

**Figure S3.** PYS spectra of PIL films.

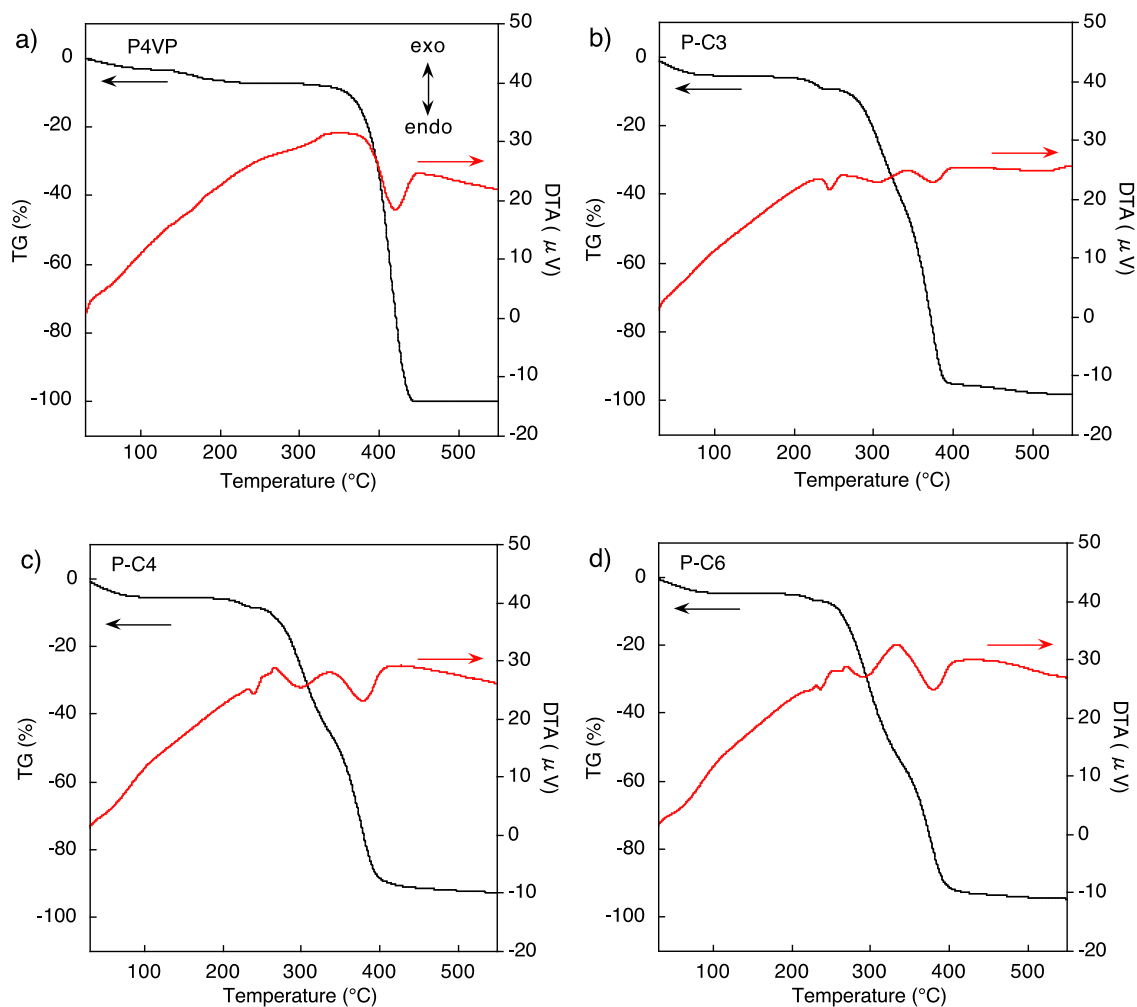

**Figure S4.** TG and DTA curves of a) P4VP, b) P-C3, c) P-C4, and d) P-C6.

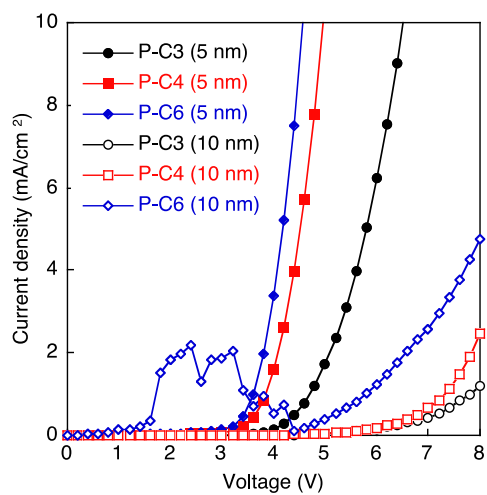

**Figure S5.** The PIL thickness influences on current density–voltage characteristics of OLEDs.

1. M. Montalti, A. Credi, L. Prodi and M. T. Gandolfi, *Handbook of photochemistry*, CRC/Taylor & Francis, Boca Raton, 3rd edn., 2006.
